# Supplementary material for: Shorter leukocyte telomere length is associated with distinct CSF biomarker dynamics across early AD stages in at-risk individuals
Source: bioRxiv or medRxiv preprint supplement (doi:10.1101/2024.12.03.24318248), 2024-12-05
Supplement: Supplementary file [file media-2.pdf]

## Supporting Information

### Supporting materials

#### Supplementary figures

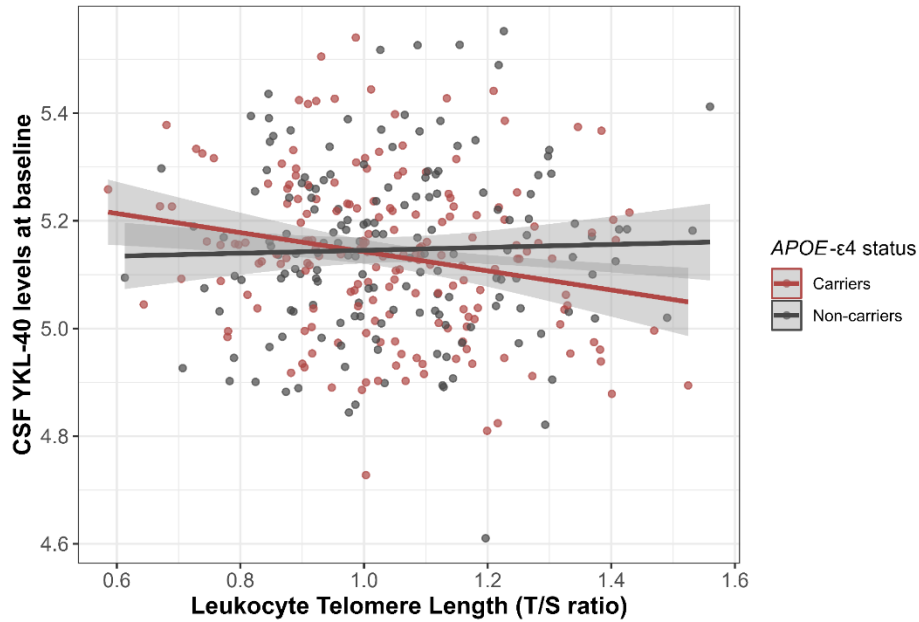

**Figure S1.** Significant interaction between LTL and *APOE*-ε4 status ( $P_{int} = 0.047$ ) on the association with CSF YKL-40 levels at baseline ( $N = 346$ ). Model was adjusted for age and sex.

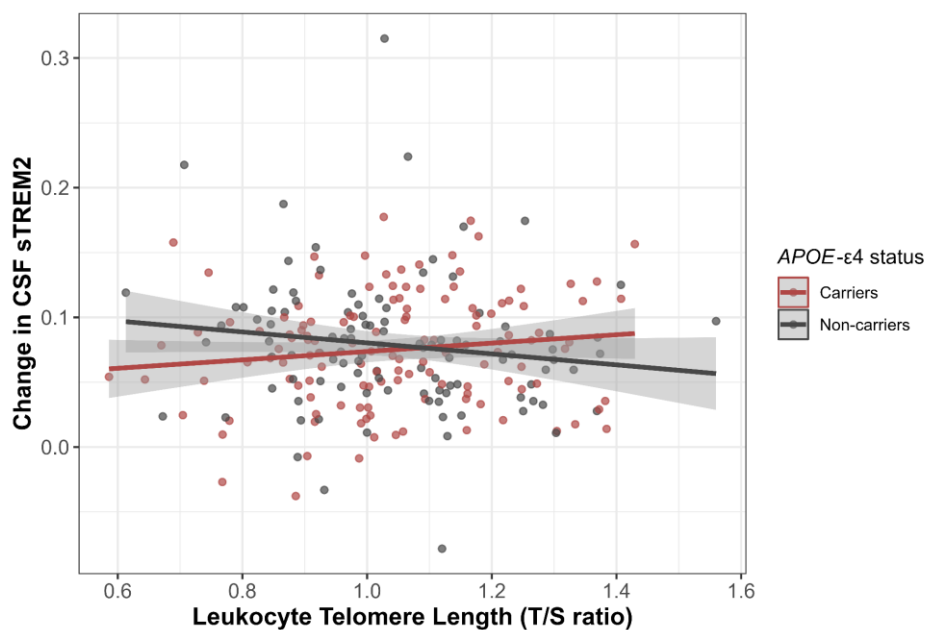

**FigureS2.** Significant interaction between LTL and *APOE*-ε4 status ( $P_{int} = 0.036$ ) on the association with the change in CSF sTREM2 levels over time ( $N = 237$ ). Model was adjusted for age and sex.

*APOE*- $\epsilon$ 4 carriers

A

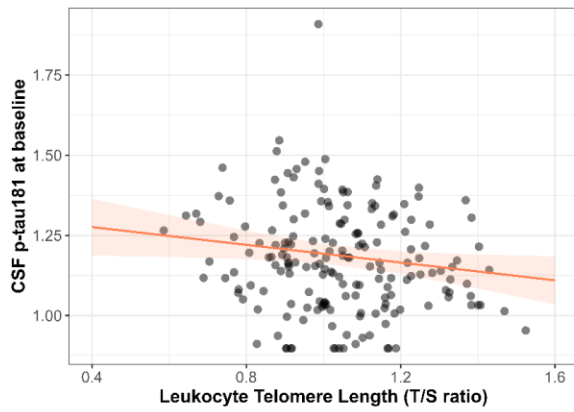

B

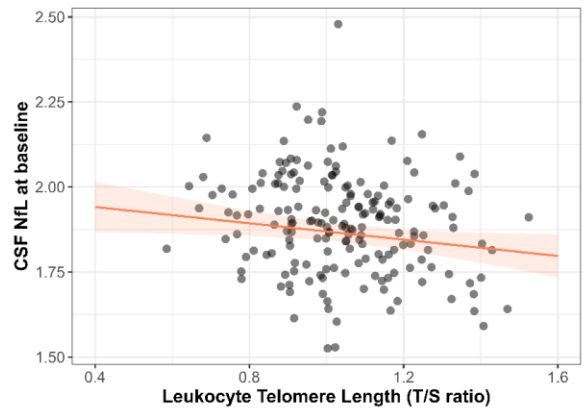

C

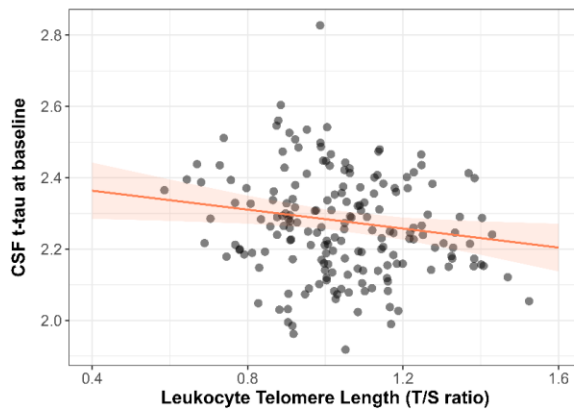

D

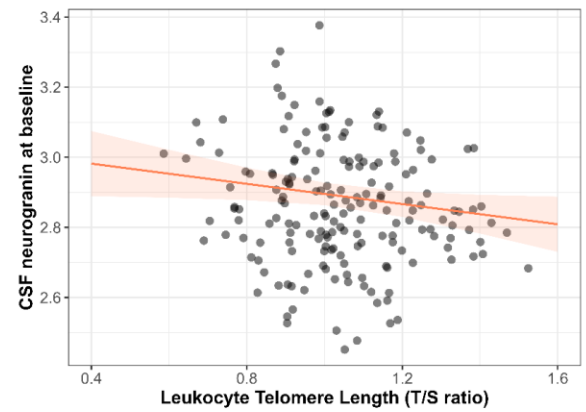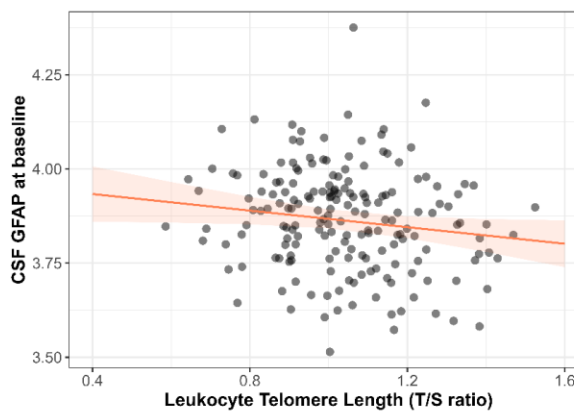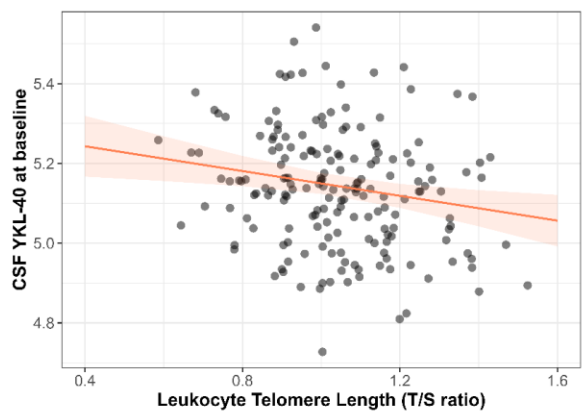

**FigureS3.** Significant associations between LTL and log-transformed CSF biomarkers levels at baseline in *APOE*- $\epsilon$ 4 carriers (N = 184). Models were adjusted for age and sex.

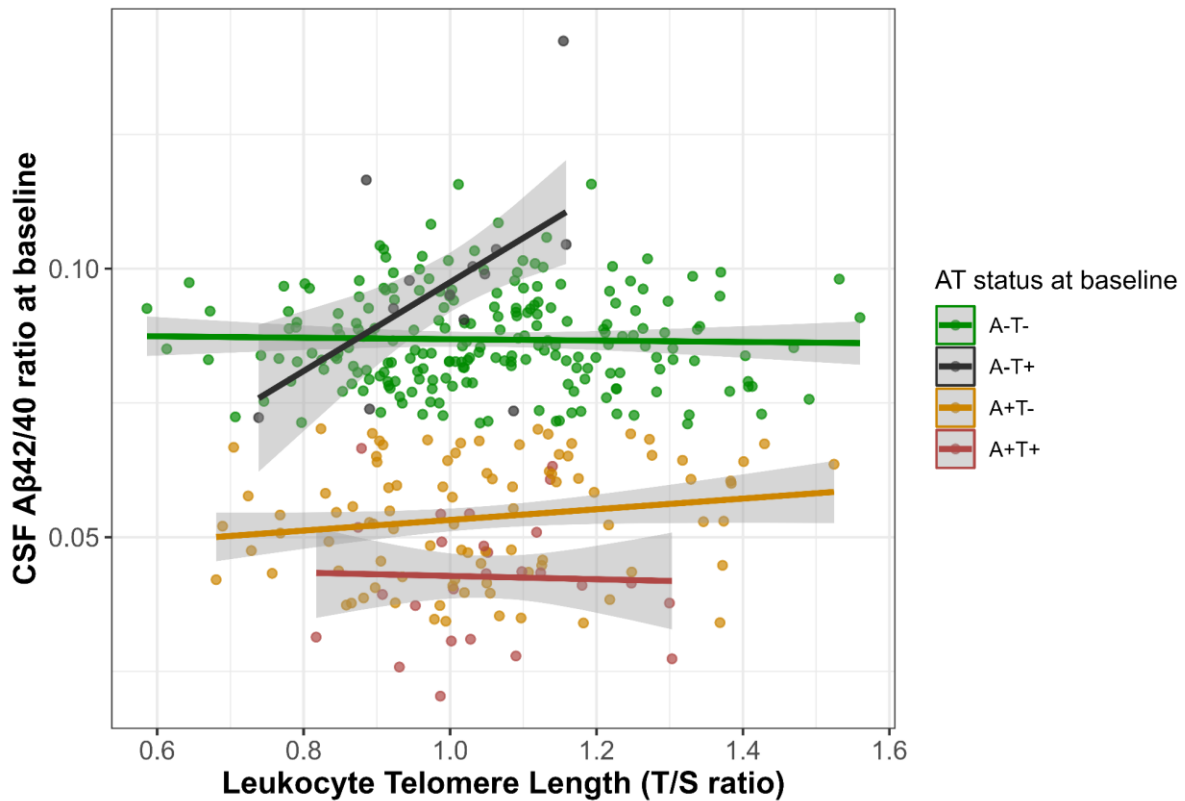

**FigureS4.** Interaction between LTL and AT status on CSF Aβ42/40 levels at baseline (A-T+ vs. A-T-: Pint = 0.002; A+T- vs. A-T-: P = 0.09) (N = 346). Model was adjusted for age, sex and APOE-ε4.

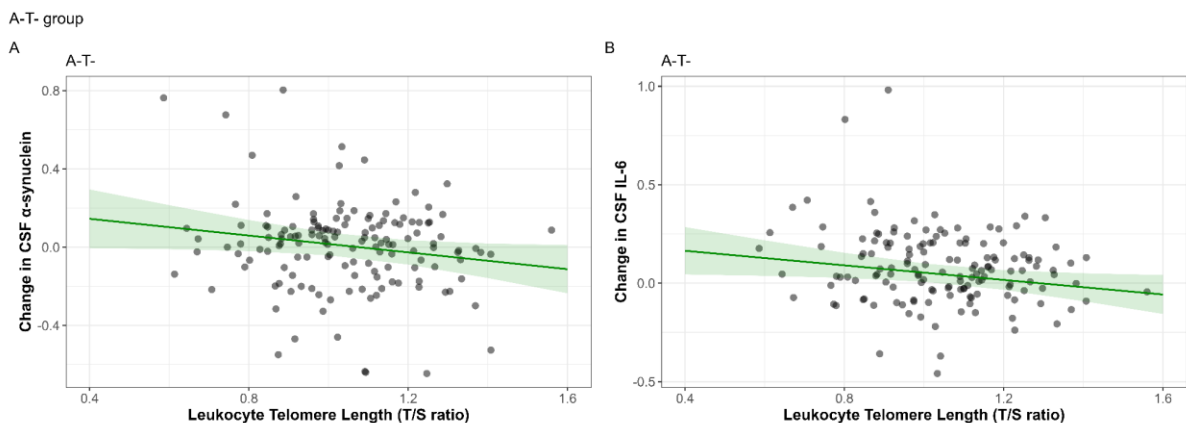

**FigureS5.** Significant associations between LTL and change in (A) CSF α-synuclein and (B) CSF IL-6 levels in the A-T- group. Models were adjusted for age, sex, APOE-ε4 status and time difference between the two visits.

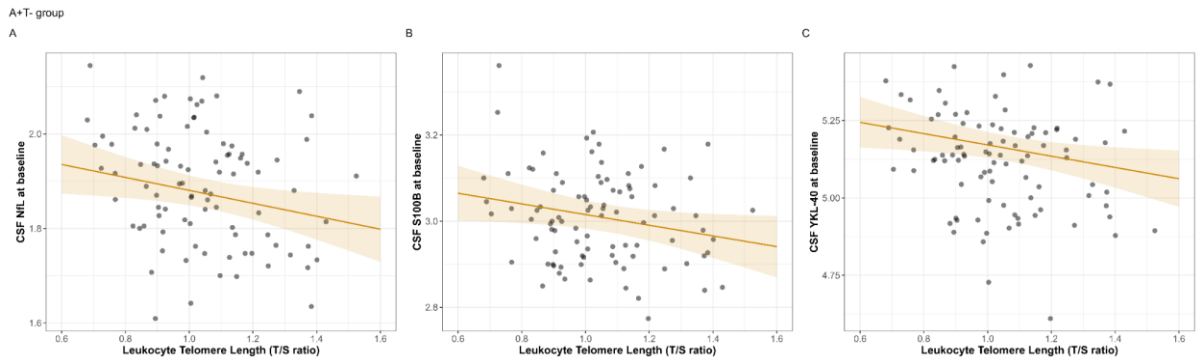

**FigureS6.** Significant associations between LTL and baseline levels of (A) CSF NfL, (B) CSF S100B, and (C) CSF YKL-50 at baseline in the A+T- group. Models were adjusted for age, sex, *APOE-ε4* status.

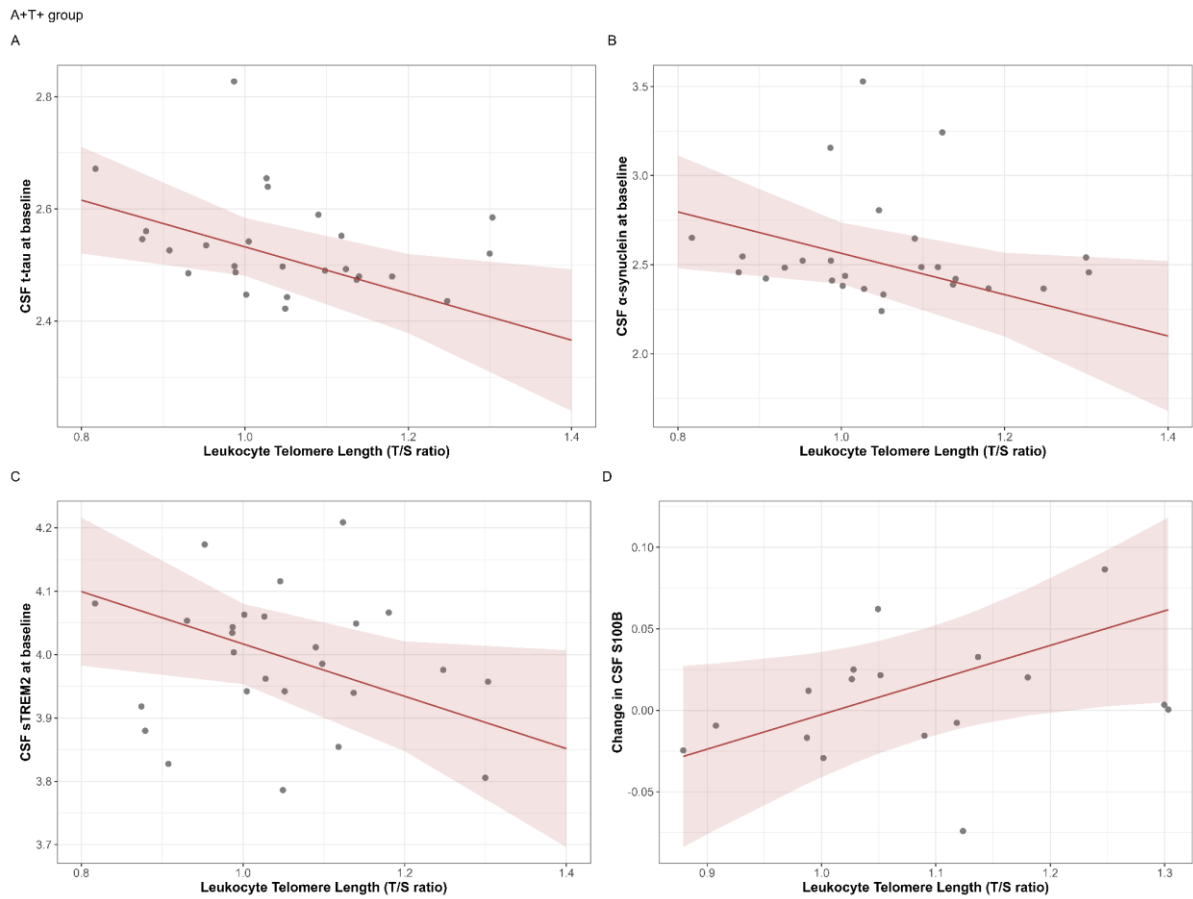

**FigureS7.** Significant associations between LTL and baseline levels of (A) CSF t-tau, (B) CSF  $\alpha$ -synuclein, (C) CSF sTREM and change over time of (D) CSF sTREM2 in the A+T+ group. Models were adjusted for age, sex and *APOE-ε4* status. Model was further adjusted for time difference between visits for the change in CSF biomarkers levels over time.

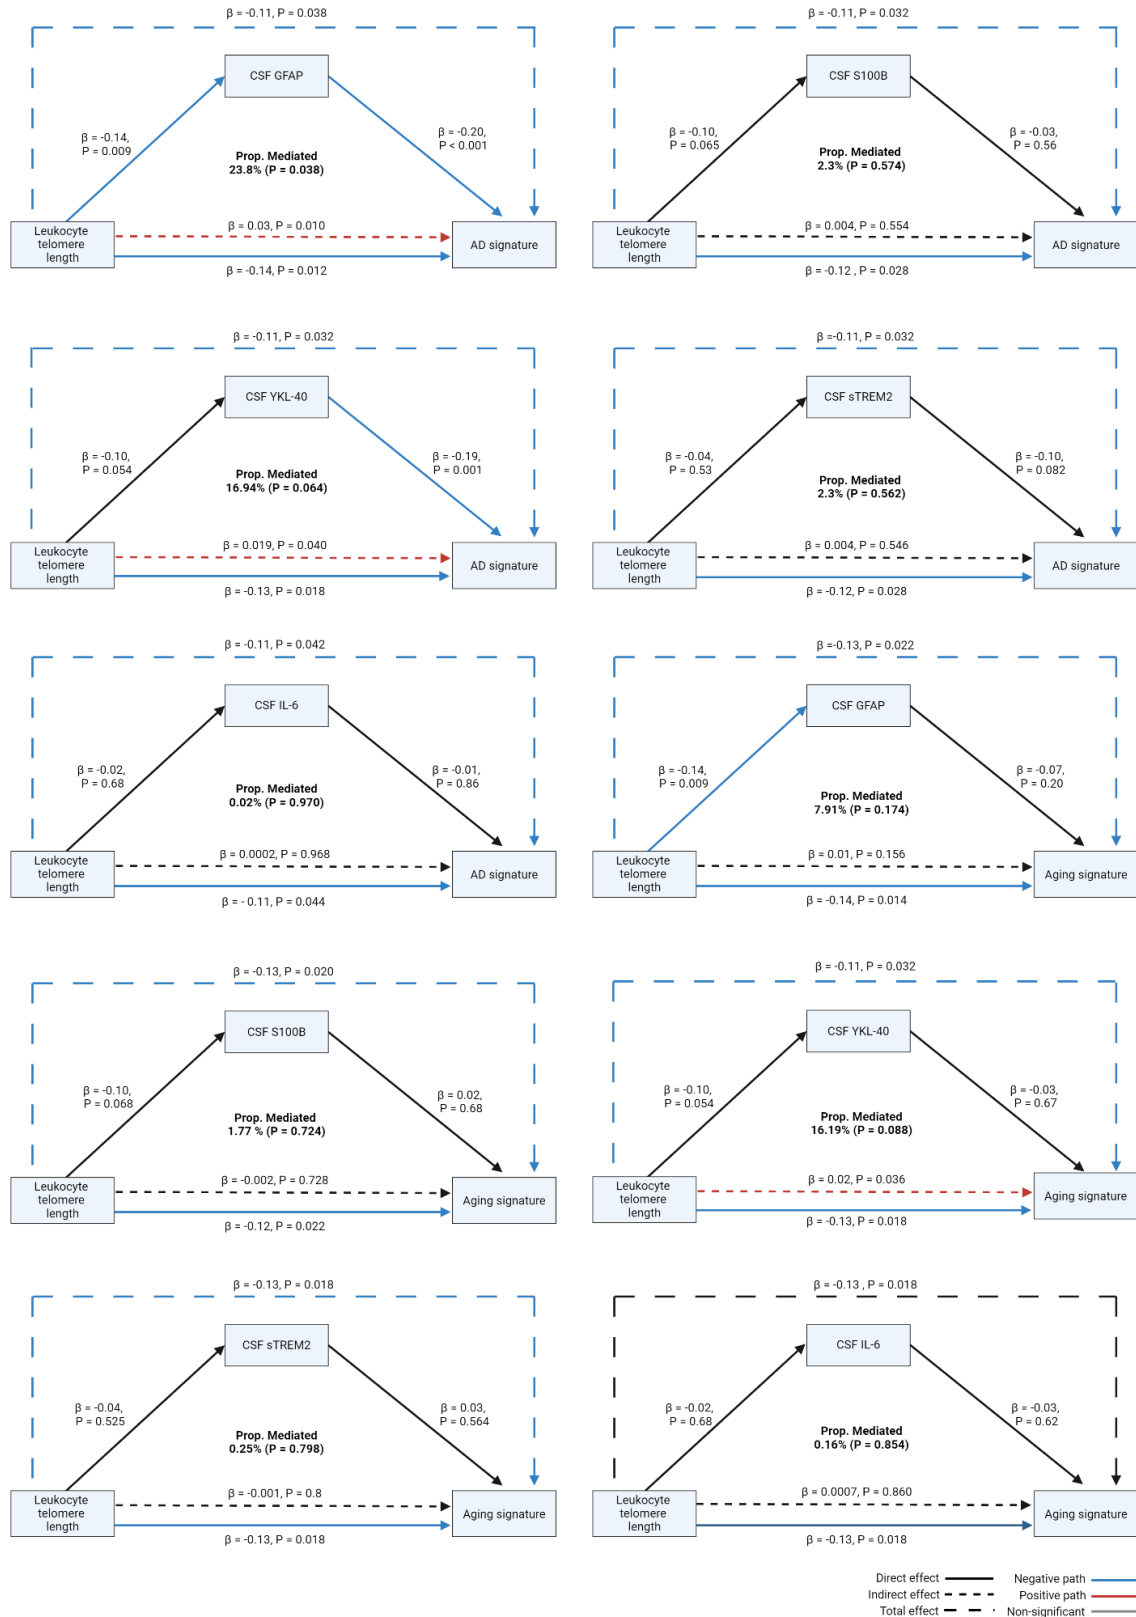

**FigureS8.** Mediator role of CSF glial and inflammatory biomarkers on the association between leukocyte telomere length and aging and AD cortical thickness signatures. Models were adjusted for age, sex, *APOE*- $\epsilon$ 4 status and firmware MRI version. All  $\beta$  are standardized coefficients.
